# Supplementary material for: TSH reference intervals in Sub-Saharan adults: A pilot study in Cameroon
Source: Research Square preprint supplement (doi:10.21203/rs.3.rs-6895452/v1), 2025-08-06
Supplement: Supplementary file 1 [file fe3bdcf3dc78527c84f2a241.pdf]

**Fundamental information from UK dietitians**  
**regarding iodine status for each food**

**Table 1.** Food groups used in the dietary analysis according to their nutritional composition and taxonomy

| No. | Food group                 | Food items                                                        |
|-----|----------------------------|-------------------------------------------------------------------|
| 1   | Noodles                    | Noodles, hanging noodles, Ramen                                   |
| 2   | Rice                       | Rice, thin rice, brown rice, aromatic rice                        |
| 3   | Beans and products         | Soya products, flavoured soy products                             |
| 4   | Meats                      | Livestock and poultry meat, processed meat products               |
| 5   | Eggs                       | Eggs, duck eggs, quail eggs, goose eggs, brined eggs              |
| 6   | Dairy                      | Erie Schmaltz milk, flavoured yoghurt, fresh milk                 |
| 7   | Fish, shrimp and shellfish | Marine products                                                   |
| 8   | Offtake of fungi and algae | Seaweed, seaweed, nori, fungus, seaweed flavoured snacks          |
| 9   | Vegetables                 | Lotus root, white radish, carrot, chilli, aubergine, etc.         |
| 10  | Fruits                     | Apples, bananas, pears, etc.                                      |
| 11  | Nuts                       | Walnuts, pistachios, Pine nuts, almonds                           |
| 12  | Condiments                 | Soy sauce, balsamic vinegar, ground ginger, ketchup, shrimp paste |
| 13  | Salt                       | Iodized salt                                                      |

| Food                          |                         | Portion            | Average iodine/<br>portion (mcg)<br>(actual iodine<br>content will vary) |
|-------------------------------|-------------------------|--------------------|--------------------------------------------------------------------------|
| Milk and<br>dairy<br>products | Cow's milk              | 200ml              | 50-100**                                                                 |
|                               | Yoghurt                 | 150g               | 50-100**                                                                 |
|                               | Cheese                  | 40g                | 15                                                                       |
| Fish                          | Haddock                 | 120g               | 390                                                                      |
|                               | Cod                     | 120g               | 230                                                                      |
|                               | Plaice                  | 130                | 30                                                                       |
|                               | Salmon fillet           | 100g               | 14                                                                       |
|                               | Canned tuna             | 100g               | 12                                                                       |
| Shellfish                     | Prawns                  | 60g                | 6                                                                        |
|                               | Scampi                  | 170g               | 160                                                                      |
| Other                         | Eggs                    | 1 egg (50g)        | 25                                                                       |
|                               | Meat/Poultry            | 100g               | 10                                                                       |
|                               | Nuts                    | 25g                | 5                                                                        |
|                               | Bread                   | 1 slice (36g)      | 5                                                                        |
|                               | Fruit and<br>vegetables | 1 portion<br>(80g) | 3                                                                        |

\*\*Depending on the season, higher value in winter

| Life stage          | Iodine required per<br>day (mcg)* |
|---------------------|-----------------------------------|
| Adults              | 150                               |
| Pregnant women      | 200                               |
| Breastfeeding women | 200                               |

\*European Food Safety Authority (EFSA) recommendations.
